# Supplementary material for: Hollow PtCo alloy nanospheres as a high-Z and oxygen generating nanozyme for radiotherapy enhancement in non-small cell lung cancer
Source: Royal Society of Chemistry journal article supplement (doi:10.1039/d1tb00486g), 2021-01-01
Supplement: d1tb00486g1.pdf [file d1tb00486g1.pdf]

## Supplementary information

### **Hollow PtCo alloy nanospheres as a high-Z and oxygen generating nanozyme for radiotherapy enhancement in non-small cell lung cancer**

Shuying Li <sup>a</sup>, Wenjie Sun <sup>a</sup>, Yuan Luo <sup>a</sup>, Yanping Gao <sup>a</sup>, Xueping Jiang <sup>a</sup>, Cheng Yuan <sup>a</sup>,  
Linshi Han <sup>a</sup>, Kuo Cao <sup>a</sup>, Yan Gong <sup>\*bc</sup>, Conghua Xie <sup>\*ade</sup>

a. Department of Radiation and Medical Oncology, Zhongnan Hospital of Wuhan University, Wuhan, China

b. Department of Biological Repositories, Zhongnan Hospital of Wuhan University, Wuhan, China

c. Tumor Precision Diagnosis and Treatment Technology and Translational Medicine, Hubei Engineering Research Center, Zhongnan Hospital of Wuhan University, Wuhan, China

d. Hubei Key Laboratory of Tumor Biological Behaviors, Zhongnan Hospital of Wuhan University, Wuhan, China

e. Hubei Cancer Clinical Study Center, Zhongnan Hospital of Wuhan University, Wuhan, China

\* Corresponding authors: Conghua Xie; Yan Gong

Email addresses: chxie\_65@whu.edu.cn (C. Xie), yan.gong@whu.edu.cn (Y. Gong)

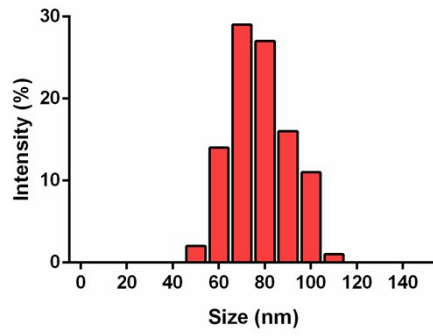

**Fig. S1** DLS measurement of the diameters of PtCo NSs.

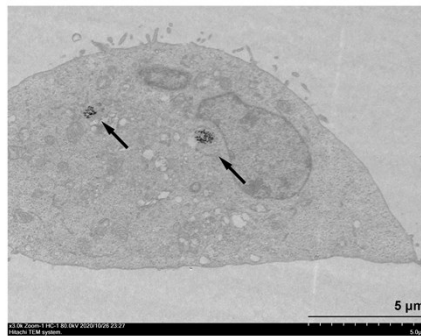

Cellular uptake

**Fig. S2** TEM image of cellular uptake.

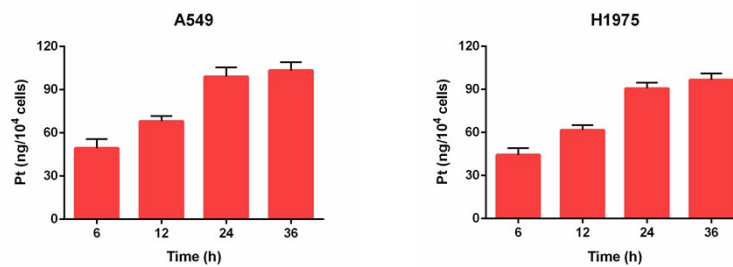

**Fig. S3** The cellular uptake of PtCo NSs by A549 and H1975 cells with different internalization times (6, 12, 24 and 36 h).

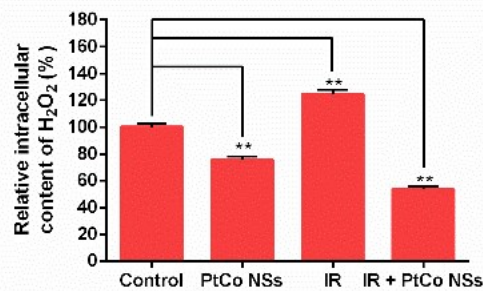

**Fig. S4** Relative intracellular content of H<sub>2</sub>O<sub>2</sub> in H1975 cells with different treatments. \*,  $p < 0.05$ ; \*\*,  $p < 0.01$ .

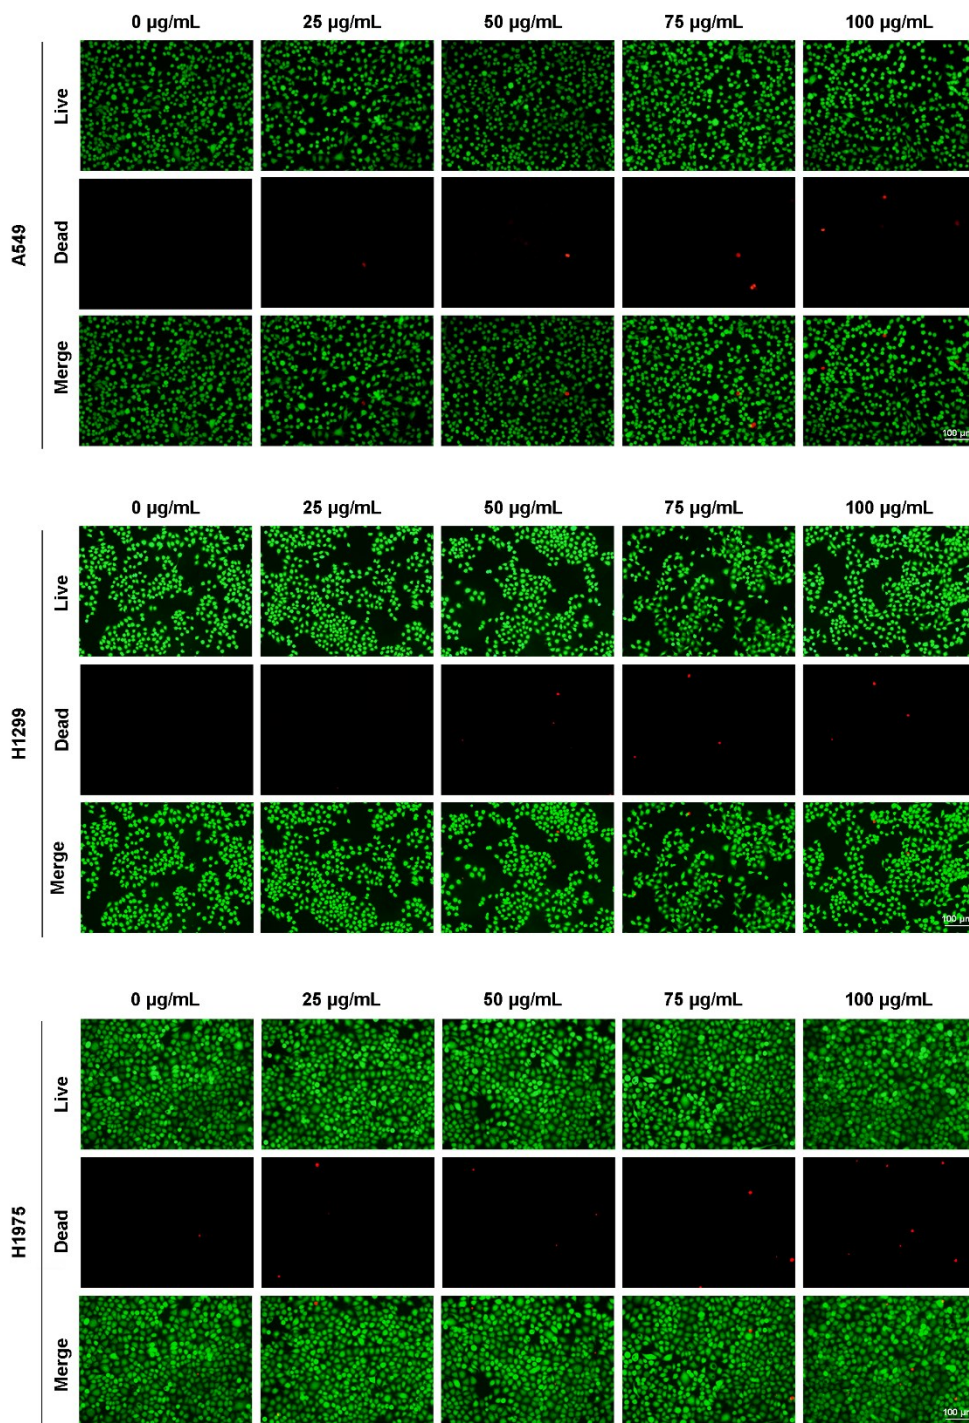

**Fig. S5** Representative Fluorescent images of A549, H1299, H1975 cells co-stained with Calcein AM (live cells, green) and PI (dead cells, red) after incubated with PtCo NSs for 24 h. The scale bar is 100  $\mu\text{m}$ .

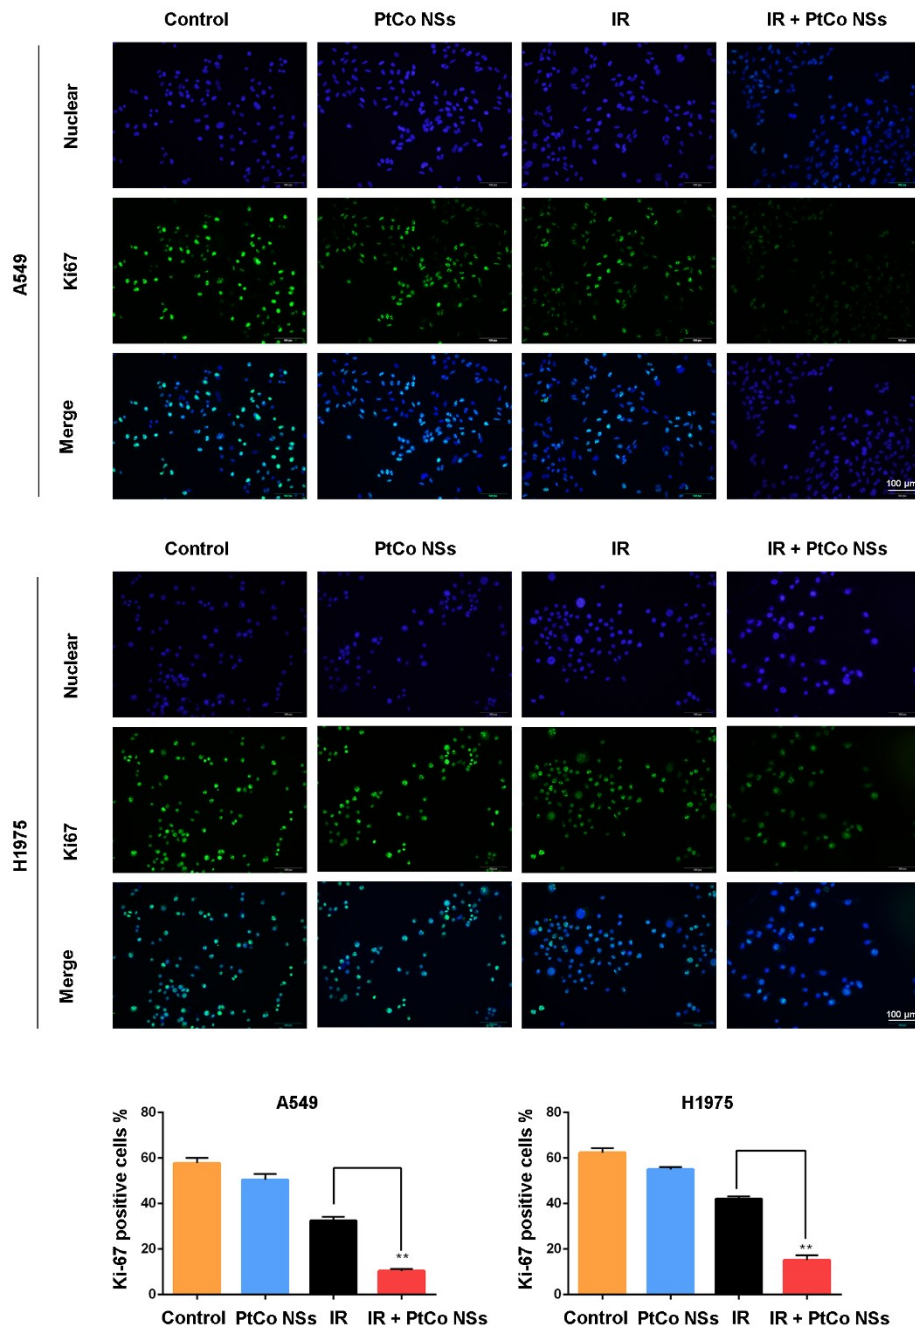

**Fig. S6** Representative fluorescent images of Ki67 staining suggested that the combination further inhibited cell proliferation. The scale bar is 100  $\mu$ m. \*,  $p < 0.05$ ; \*\*,  $p < 0.01$ .
